# Supplementary material for: Heparin and Carboxymethylchitosan Metal Nanoparticles: An Evaluation of Their Cytotoxicity
Source: PubMed Central journal article supplement (PMC3590581; doi:10.1155/2013/314091), 2013-02-18
Supplement: 314091.f1.pdf [file 314091.f1.pdf]

### Supplementary material

We have evaluated by two way ANOVA the cytotoxicity data which are plotted in the text figures. Differences in cytotoxicity due to exposure time resulted almost always significant. Those due to coating resulted definitely significant only for  $\text{Co}_3\text{O}_4$  NPs vs  $\text{Co}_3\text{O}_4$ @heparin and  $\text{Fe}_3\text{O}_4$  NPs vs  $\text{Fe}_3\text{O}_4$ @CMCS.

\*  $p \leq 0.05$ ; \*\*  $p \leq 0.01$ ; \*\*\*  $p \leq 0.005$ .

| $\text{Co}_3\text{O}_4$ NPs | Between<br>$\text{Co}_3\text{O}_4$ NPs/ $\text{Co}_3\text{O}_4$ @heparin |     | Among<br>times |     |
|-----------------------------|--------------------------------------------------------------------------|-----|----------------|-----|
| 5 $\mu\text{g}$             | 0,00203                                                                  | *** | < .0001        | *** |
| 10 $\mu\text{g}$            | 0,00189                                                                  | *** | < .0001        | *** |
| 20 $\mu\text{g}$            | 0,00747                                                                  | **  | < .0001        | *** |
| 40 $\mu\text{g}$            | 0,00561                                                                  | **  | < .0001        | *** |
| 60 $\mu\text{g}$            | 0,00608                                                                  | **  | < .0001        | *** |
| 100 $\mu\text{g}$           | 0,00462                                                                  | *** | < .0001        | *** |

**Table 1:** Two Way ANOVA on  $\text{Co}_3\text{O}_4$  NPs and  $\text{Co}_3\text{O}_4$ @heparin.

| $\text{Fe}_3\text{O}_4$ NPs | Between<br>$\text{Fe}_3\text{O}_4$ NPs/ $\text{Fe}_3\text{O}_4$ @heparin |   | Among<br>times |     |
|-----------------------------|--------------------------------------------------------------------------|---|----------------|-----|
| 5 $\mu\text{g}$             | 0,34495                                                                  |   | 0,07401        |     |
| 10 $\mu\text{g}$            | 0,20480                                                                  |   | 0,00119        | *** |
| 20 $\mu\text{g}$            | 0,03442                                                                  | * | < .0001        | *** |
| 40 $\mu\text{g}$            | 0,01517                                                                  | * | 0,00039        | *** |
| 60 $\mu\text{g}$            | 0,02287                                                                  | * | 0,01982        | *   |
| 100 $\mu\text{g}$           | 0,05681                                                                  |   | 0,08248        |     |

**Table 2:** Two Way ANOVA on  $\text{Fe}_3\text{O}_4$  NPs and  $\text{Fe}_3\text{O}_4$ @heparin.

| NiO NPs           | Between<br>NiO NPs/NiO@heparin |    | Among<br>times |     |
|-------------------|--------------------------------|----|----------------|-----|
| 5 $\mu\text{g}$   | 0,06262                        |    | < .0001        | *** |
| 10 $\mu\text{g}$  | 0,15043                        |    | < .0001        | *** |
| 20 $\mu\text{g}$  | 0,00841                        | ** | < .0001        | *** |
| 40 $\mu\text{g}$  | 0,02880                        | *  | < .0001        | *** |
| 60 $\mu\text{g}$  | 0,26751                        |    | < .0001        | *** |
| 100 $\mu\text{g}$ | 0,54143                        |    | < .0001        | *** |

**Table 3:** Two Way ANOVA on NiO NPs and NiO@heparin.

| $\text{Fe}_3\text{O}_4$ NPs | Between<br>$\text{Fe}_3\text{O}_4$ NPs/ $\text{Fe}_3\text{O}_4$ @CMCS |     | Among<br>times |     |
|-----------------------------|-----------------------------------------------------------------------|-----|----------------|-----|
| 5 $\mu\text{g}$             | < .0001                                                               | *** | 0,00022        | *** |
| 10 $\mu\text{g}$            | < .0001                                                               | *** | 0,00024        | *** |
| 20 $\mu\text{g}$            | < .0001                                                               | *** | < .0001        | *** |
| 40 $\mu\text{g}$            | < .0001                                                               | *** | < .0001        | *** |
| 80 $\mu\text{g}$            | < .0001                                                               | *** | < .0001        | *** |
| 160 $\mu\text{g}$           | < .0001                                                               | *** | < .0001        | *** |

**Table 4:** Two Way ANOVA on  $\text{Fe}_3\text{O}_4$  NPs and  $\text{Fe}_3\text{O}_4$ @CMCS- covalent.
